# Supplementary material
Source: Research Square preprint supplement (doi:10.21203/rs.3.rs-10326973/v1)
Supplement: Supplementary file 1 [file 1adeff3268c776f813c98d3b.docx]

**Supplementary Table 2 SNP marker generation using variant calling**

| **Total Variants [SNPs + Indels]** | 2187892 |
| --- | --- |
| Total SNPs | 1986376 |
| Biallelic SNPs | 1978661 |
| Biallelic Chromosome Only SNPs | 1973111 |
| **SNPs after Parental filtering:** | 269460 |
| this filtering was done as follows | |
| (a) all heterozygous SNP were removed between the parents. | |
| (b) all missing Parental SNPs were removed | |
| (c) monomorphic SNPs between parents were discarded | |
| **SNPs left after discarding markers** | **3531** |
| **Total no of markers grouped into 12 linkage groups** | **3504** |
