# Supplementary material
Source: Research Square preprint supplement (doi:10.21203/rs.3.rs-10326973/v1)
Supplement: Supplementary file 2 [file 3dcf21f959b69cfbb123f478.docx]

**Supplementary Table 3 Linkage maps spanned by different chromosomes**

| **Chromosome no.** | **Number of markers** | **Map length (cM)** | **Average marker distance (cM)** |
| --- | --- | --- | --- |
| 1 | 319 | 55.914 | 0.18 |
| 2 | 296 | 58.475 | 0.2 |
| 3 | 302 | 79.099 | 0.26 |
| 4 | 345 | 54.339 | 0.16 |
| 5 | 214 | 61.088 | 0.29 |
| 6 | 328 | 56.813 | 0.17 |
| 7 | 330 | 61.69 | 0.19 |
| 8 | 278 | 55.186 | 0.2 |
| 9 | 278 | 54.1 | 0.19 |
| 10 | 200 | 53.081 | 0.27 |
| 11 | 360 | 53.485 | 0.15 |
| 12 | 254 | 60.905 | 0.24 |
| **Total Map Length (cM) 704.175** | | | |
| **Total Number of Markers 3504** | | | |
