# Supplementary material
Source: Research Square preprint supplement (doi:10.21203/rs.3.rs-10326973/v1)
Supplement: Supplementary file 3 [file b821b074fcac6b8869137c8b.xlsx]

## Sheet: Disease evaluation
2022	BC2F6
	Mean PH (cm)	Mean LH (cm)	Mean RLH (%)	Mean NT	Mean NOIT	Mean DS	Mean HD
7176	96.15	25.2	26.21	12.335	5.085	3	84.5
7177	93.1	27.4	29.46	8.585	3.665	3.5	88
7178	92.15	28.2	30.67	11.165	5.415	3.9	84.5
7180	94.05	27.1	28.825	14.25	5.75	3.5	84.5
7187	91	24.95	27.43	8.5	3.915	3.2	82.5
7188	96.75	27	27.83	10.25	5.5	3.7	81.5
7189	90.4	23.8	26.295	8.585	3.25	3	86.5
7193	93.85	22.85	24.24	10.5	4.75	2.8	88
7195	93.85	24.65	26.305	10.125	4.25	3.2	82
7196	93.2	25.15	26.98	9.915	4.085	3	83.5
7198	97.1	21.5	22.21	11.5	5.085	2.3	84.5
7199	95.4	22.8	23.905	12.75	5.5	3	85.5
7200	98	23	23.455	12.335	4.835	3	84.5
7201	94.65	24.55	25.895	7.25	2.75	3	83
7203	96.15	23.85	24.82	12	5	3	86.5
7204	94.3	25.45	27	11.415	6.165	3.2	86.5
7205	92.15	21.25	22.98	10.75	4.875	2.6	83.5
7206	90.15	29.25	32.525	13.5	4.75	4.6	82.5
7207	92.05	22.55	24.465	12.75	3.625	3	83.5
7208	95.35	28.7	30.06	12.125	5.125	4.1	85.5
7209	93.4	27.45	29.445	10.75	4	4	83
7210	92.5	23.25	25.19	9.625	4.625	3.2	89
7213	95.125	27.625	29.105	12	3.085	3.5	81
7214	92.65	28.5	30.855	8	3.25	4	77.5
7215	93.2	28.2	30.33	9.085	4.085	4	86
7216	94.05	23.8	25.3	16.415	6.165	3	78
7218	92.65	25.8	27.93	10.875	6.375	3.4	78
7219	95.8	24.4	25.47	10.75	5.5	3	85
7220	94.85	27.25	28.685	11	4.125	3.5	78.5
7221	97.1	25.3	26.16	10.835	4.165	3.2	86
7222	96.6	23.8	24.65	11	4.67	3	82
7223	99.8	26.5	26.495	8	3.335	2.8	84.5
7224	94.7	24.35	25.74	10.75	3.75	2.8	84.5
7226	93.4	28.05	30.12	7.665	3.415	4	79.5
7227	95.5	25.25	26.47	10.5	3.5	3	84.5
7228	95.15	29.2	30.645	11.5	5.5	4	88
7229	95.45	24.8	25.925	9.665	4.915	2.8	87
7230	94.1	28.25	29.925	10.585	4.415	3.8	86
7232	93.65	26.4	28.145	10.25	4.75	3.7	85.5
7233	96.45	28.45	29.425	8.5	4.875	4.2	83
7234	92.3	25.4	27.435	8.875	3.625	3.5	78.5
7235	95.9	24	25.065	8.335	3.415	3	85
7236	95.05	22.65	23.795	10.25	3.875	3	85.5
7238	97.375	24.25	24.94	9.335	4.75	3	86
7240	95.5	24.65	25.83	10.25	4	3	79.5
7241	94.95	22.8	23.945	11.415	4.5	2.8	86.5
7242	86.95	24.9	29.095	9.5	4	3.5	81
7245	96.2	24.25	25.395	10.085	4.665	3.2	84
7246	89.8	24.25	26.985	11	3.5	3	83.5
7249	93.65	27.85	29.595	9.125	5.125	4.2	80
7250	87	21.4	24.61	7.2	3.6	3	72
7252	93.25	24.55	26.465	10.625	4.25	3.2	81.5
7254	92.45	27	29.125	9.5	4.665	4	79.5
7255	93.7	23.8	25.32	8.665	3.835	2.6	81.5
7257	93.4	22.7	24.31	10.835	5.25	3	78
7258	88	23	26.16	7.25	3.75	3	69
7259	89.5	25	28.04	15.5	5.5	3.5	68
7260	88.7	24.3	27.395	8.75	3.085	3	76.5
7261	92.2	24	26	15.33	4.67	3	68
7264	93.85	25.9	27.655	9.75	3.875	3	79
7265	91.6	23.6	25.89	13.67	5.67	3	70
7267	93.8	23.2	24.75	7.33	4	3.4	70
7268	93	25.6	27.54	11	4.5	3.4	68
7269	95.5	25.25	26.46	9.67	4.33	3	65
7270	93.6	26.4	28.15	8.67	3.67	3.8	67
7271	95.6	24.15	25.27	6.335	2.585	2.8	78.5
7272	95.2	25.2	26.51	7.5	3.25	3	68
7273	96.4	22.6	23.44	12.33	5.67	3	67
7275	90	23.2	25.75	10.25	4.5	3	68
7277	95.6	23	24.12	11.085	5.75	2.6	80
7278	97.6	26.6	27.2	9	3.625	3.3	81
7279	94.8	23.35	24.665	10.5	5.75	2.8	82
7280	95.15	26.55	27.94	9.875	4.625	3.4	81.5
7281	93.8	27.8	29.695	10.65	5	3.9	76.5
7282	94.2	24.6	26.05	10	3.75	3	65
7283	97.55	24.75	25.385	7.5	4.125	3	80
7284	93.95	25.05	26.73	8.335	3	2.8	79
7285	90.2	23.8	26.45	11.75	4	3	67
7288	89	29	32.51	7.5	3.25	4.6	72
7289	92.4	24	25.95	11.8	4	3	67
7290	91.7	27.95	30.455	8.3	3.4	4.2	77
7291	89.4	24.6	27.54	12.25	4.25	3.4	65
7292	91.6	26.85	29.365	9.875	4	4.2	80.5
7293	87.25	27	30.92	8.75	3.75	4	68
7294	86.8	23.8	27.39	7.25	2	3	67
7295	87.2	25.6	29.33	8.8	3.6	3	65
7296	87	24	27.56	7	3	3	65
7297	91.6	24.8	27.12	6.5	2	3	67
7299	89	26	29.16	7.6	3	3.8	69
7300	84.875	28.625	33.635	11.75	5.625	4.75	86.5
7301	93	25.2	27.12	10.6	5	3.4	79
7302	83	23.75	28.69	9	5	3.5	69
7303	90.25	25.3	27.915	9	5.125	3.2	80.5
7304	84.5	23.85	28.24	9	3.5	3	79
7307	78.665	24.165	32.055	8	4.5	4	82.5
7308	85.33	23.66	27.8	14.33	6	3	79
7309	88.6	24.8	27.94	11.4	5.4	3.4	82
7311	88.6	23.2	26.22	9.5	5	3	82
7312	90.7	30.9	34.06	8.35	4.2	5	81.5
7313	87.2	28.8	33.23	11.4	5	4.6	82
7315	87	24.4	28.09	9.8	3.8	3.4	84
7316	88.4	27	30.85	9.2	3.2	4.2	84
7317	90.6	24.8	27.41	10.6	4.6	3.4	84
7318	95.4	25.45	26.75	9.125	3.875	3.2	85
7319	93	26.625	28.855	7.125	3.75	4	85.5
7320	94.65	24.6	26.185	9.25	3.625	3.2	87
7321	95.25	25.125	26.445	10.585	4.415	3.25	83.5
7322	91.7	23.2	25.48	8.125	3.625	3.4	81.5
7323	91.65	24.6	26.8	7.625	3.25	3	82.5
7324	93.9	27.45	29.265	10	4	3.8	89
7325	92.375	29.875	32.335	13.75	6.25	4	83.5
7327	88.5	26	29.42	9.33	3.67	3.5	79
7328	95.625	25.875	27.18	9.085	3.75	3.75	88
7329	87.6	28.3	32.33	10.2	4.2	4.2	86
7330	89.7	25.4	28.54	9.165	4.25	3.4	87.5
7331	90.9	27.15	29.715	7.665	3.165	4.2	88.5
7332	95.9	30.75	31.99	8.75	4.25	4.4	83
7333	89.8	28.6	31.83	11.5	4.75	4.2	76
